# Supplementary material for: Gas Chromatography-Mass Spectrometry for Metabolite Profiling of Japanese Black Cattle Naturally Contaminated with Zearalenone and Sterigmatocystin
Source: PubMed Central journal article supplement (PMC5666341; doi:10.3390/toxins9100294), 2017-09-21
Supplement: toxins-09-00294-s001.pdf [file toxins-09-00294-s001.pdf]

# Supplementary Materials: Gas Chromatography-Mass Spectrometry for Metabolite Profiling of Japanese Black Cattle Naturally Contaminated with Zearalenone and Sterigmatocystin

Katsuki Toda, Emiko Kokush, Seiichi Uno, Ayaka Shiiba, Hiroshi Hasunuma, Yasuo Fushimi, Missaka P.B. Wijayagunawardane, Chunhua Zhang, Osamu Yamato, Masayasu Taniguchi, Johanna Fink-Gremmels and Mitsuhiro Takagi

**Table S1.** All detected/identified 55 analytes; retention time (RT), derivation, quantifire ion (m/z) and qualifirier ion (m/z).

| Metabolites (Derivatized by TMS)               | RT    | Quantifire Ion (m/z) | Qualifirier Ion (m/z) |
|------------------------------------------------|-------|----------------------|-----------------------|
| Lactate                                        | 6.27  | 117                  | 147                   |
| Glycolic acid                                  | 6.52  | 147                  | 73                    |
| Alanine                                        | 6.93  | 116                  | 147                   |
| Hydroxyisovaleric acid                         | 8.52  | 147                  | 117                   |
| Isovaleric acid                                | 8.52  | 131                  | 147                   |
| Ethylhydracrylic acid                          | 8.79  | 147                  | 247                   |
| Ethanolamine                                   | 8.84  | 174                  | 100                   |
| Succinic acid                                  | 10.00 | 247                  | 147                   |
| Glycine                                        | 10.02 | 174                  | 248                   |
| 2,2-Dimethyl succinic acid                     | 10.09 | 231                  | 275                   |
| Methyl succinic acid                           | 10.15 | 261                  | 147, 217              |
| Glyceric acid                                  | 10.20 | 292                  | 189                   |
| Deoxytetronic acid                             | 10.37 | 292                  | 147                   |
| Serine                                         | 10.61 | 204                  | 218                   |
| Threonine                                      | 10.94 | 218                  | 219, 291              |
| Methylcatechol                                 | 11.02 | 268                  | 73                    |
| Deoxytetronic acid                             | 11.29 | 103                  | 219                   |
| $\beta$ -Alanine                               | 11.52 | 248                  | 174, 290              |
| Methylbutyrylglycine                           | 12.10 | 172                  | 216, 203              |
| Butyrylglycine                                 | 12.21 | 172                  | 274, 102              |
| Threitol                                       | 12.51 | 217                  | 307, 205              |
| Oxoproline (Pyroglutamic acid)                 | 12.69 | 156                  | 230                   |
| Threonic acid                                  | 12.94 | 292                  | 205, 220              |
| Creatinine                                     | 13.11 | 314                  | 329                   |
| Hydroxyphenylacetic acid                       | 14.12 | 296                  | 296                   |
| Lyxose                                         | 14.26 | 307                  | 217                   |
| Taurine                                        | 14.42 | 326                  | 269                   |
| Xylitol                                        | 14.84 | 217                  | 307, 319              |
| Adonitol                                       | 15.05 | 217                  | 307, 319              |
| Acconitic acid                                 | 15.32 | 229                  | 147                   |
| Glycerol-3-phosphate                           | 15.44 | 357                  | 299, 455              |
| Phosphocolamine                                | 15.68 | 174                  | 188                   |
| Myristic- <i>d</i> 27 acid (internal standard) | 16.21 | 73                   | 147                   |
| Hippuric acid                                  | 16.37 | 206                  | 105                   |

|                         |       |     |          |
|-------------------------|-------|-----|----------|
| Phenaceturic acid       | 16.72 | 218 | 147      |
| Allantoin               | 16.79 | 331 | 431, 446 |
| Hydroxyphenyllactate    | 16.91 | 179 | 308      |
| Lysine                  | 16.91 | 174 | 317      |
| Galacturonic acid       | 17.26 | 333 | 160      |
| Tyrosine                | 17.32 | 218 | 280      |
| Gluconic acid           | 17.55 | 333 | 292      |
| Pantothenic acid        | 17.82 | 219 | 420      |
| Glucuronic acid         | 18.06 | 217 | 204      |
| myo-Inositol            | 18.77 | 205 | 318      |
| Uric acid               | 18.84 | 441 | 456      |
| Glucose                 | 18.95 | 217 | 204      |
| Cinnamate               | 19.14 | 319 | 205      |
| Galactose               | 19.19 | 319 | 205      |
| Indol-3-acetic acid     | 19.54 | 290 | 407      |
| Tryptophan              | 19.71 | 218 | 130      |
| Pseudouridine           | 20.9  | 357 | 217      |
| Galactopyranoside       | 21.07 | 204 | 337      |
| Ribofuranose            | 21.42 | 217 | 147      |
| p-Tolyl-β-D-glucuronide | 21.67 | 375 | 180      |
| Monopalmitin            | 22.95 | 371 | 459      |
| Mannobiose              | 23.7  | 301 | 204      |
| Lactose                 | 23.82 | 319 | 204      |

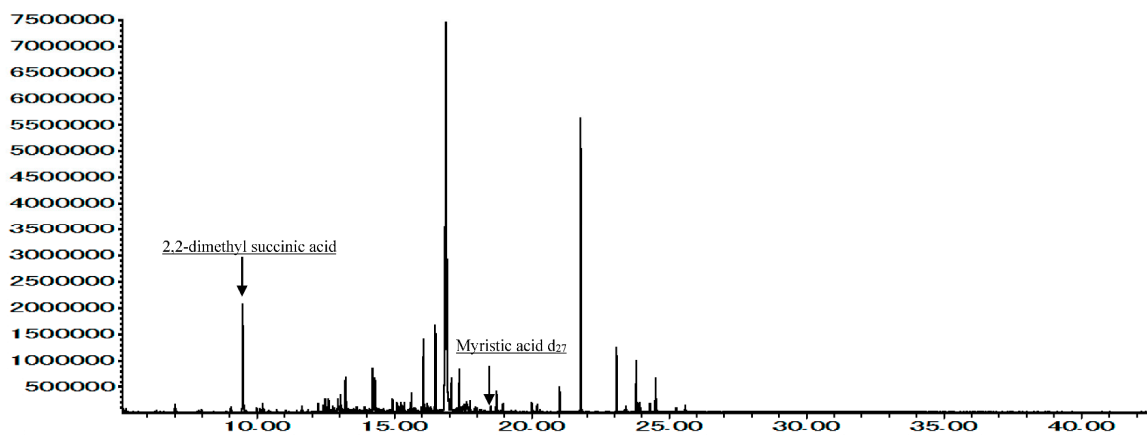

Figure S1. Representative chromatogram of the GC/MS analysis in the present study.
